# Supplementary material for: Antibody-conjugated mesoporous silica nanoparticles for brain microvessel endothelial cell targeting
Source: Royal Society of Chemistry journal article supplement (doi:10.1039/c7tb01385j), 2017-01-01
Supplement: c7tb01385j1.pdf [file c7tb01385j1.pdf]

Supporting Information

# Antibody-Conjugated Mesoporous Silica Nanoparticles for Brain Microvessel Endothelial Cells Targeting

*Meryem Bouchoucha<sup>a,b,c,d,†</sup>, Éric Béliveau<sup>e,f,d,e,†</sup>, Freddy Kleitz<sup>a,d,e,\*</sup>, Frédéric  
Calon<sup>e,f,d,e,\*</sup>, Marc-André Fortin<sup>b,c,d,e,\*</sup>*

<sup>a</sup> Department of Chemistry, Université Laval, Québec (QC), G1V 0A6, Canada.

<sup>b</sup> Department of M.M.Materials Engineering, Université Laval, Québec (QC), G1V 0A6, Canada.

<sup>cb</sup> Centre de recherche du centre hospitalier universitaire de Québec (CR-CHUQ), axe Médecine régénératrice, Québec (QC), G1L 3L5, Canada.

<sup>de</sup> Centre de recherche sur les matériaux avancés (CERMA), Université Laval, Québec (QC), G1V 0A6, Canada.

<sup>ed</sup> Faculty of Pharmacy, Université Laval, Québec (QC), G1V 0A6, Canada.

<sup>fe</sup> Neurosciences Axis, Centre de recherche du CHU de Québec, Québec (QC), Canada.

<sup>†</sup> Equal contribution

\* Corresponding authors

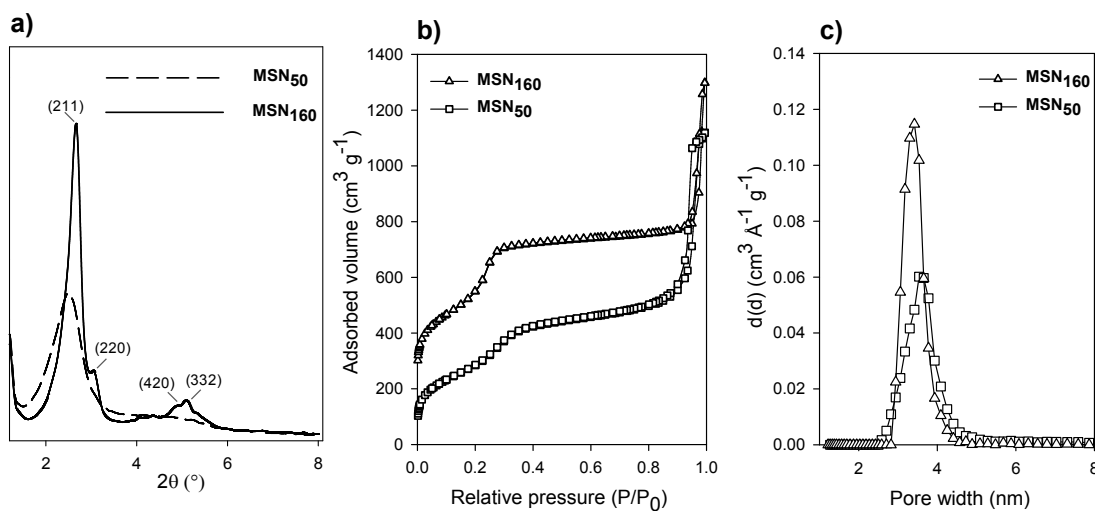

**Figure S1.** Powder XRD patterns (a), N<sub>2</sub> physisorption isotherms (-196 °C) and (b) respective NLDFT pore size distributions (c) of small and large nanoparticles. The isotherm for large MSN (MSN<sub>160</sub>) is offset vertically by 200 cm<sup>3</sup> g<sup>-1</sup> STP.

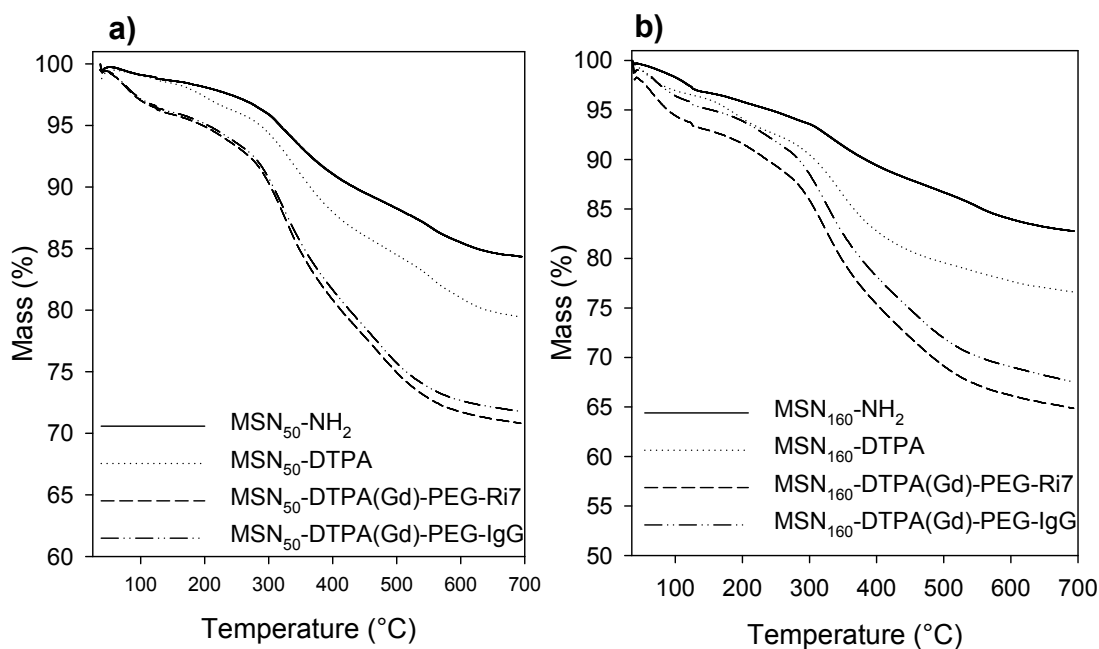

**Figure S2.** Thermogravimetric analysis of small and large functionalized mesoporous silica nanoparticles (a and b, respectively).

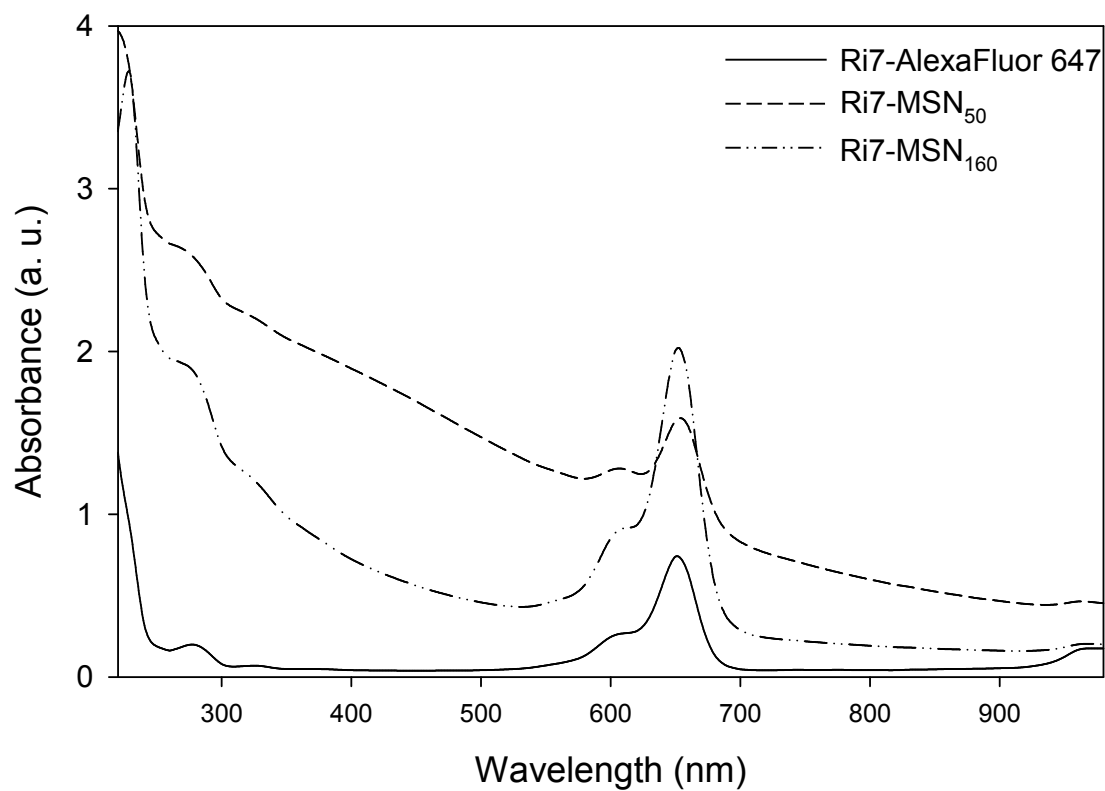

**Figure S3.** UV-Visible spectra of Ri7 labeled with AlexaFluor647 before and after conjugation to small and large mesoporous nanoparticles.

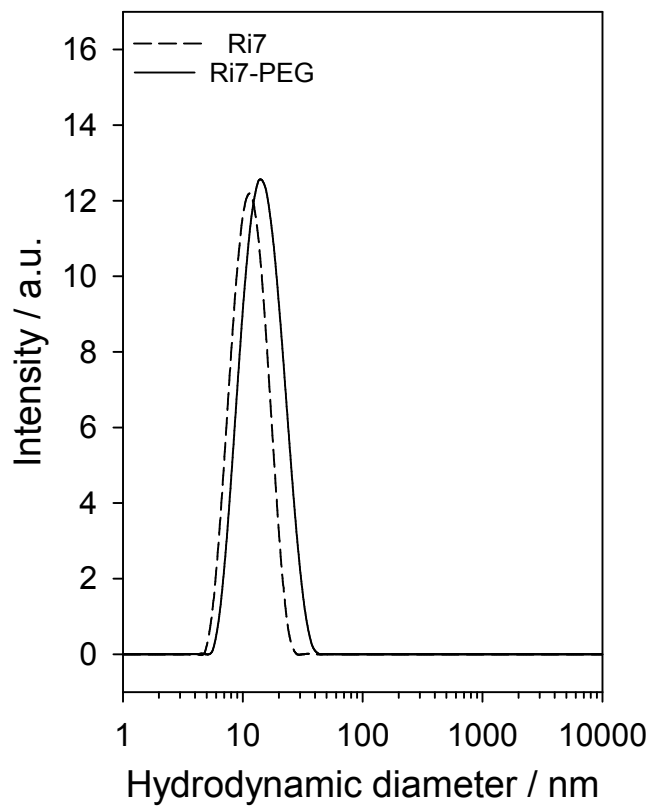

**Figure S4.** DLS analyses of Ri7 antibody before and after PEG grafting.

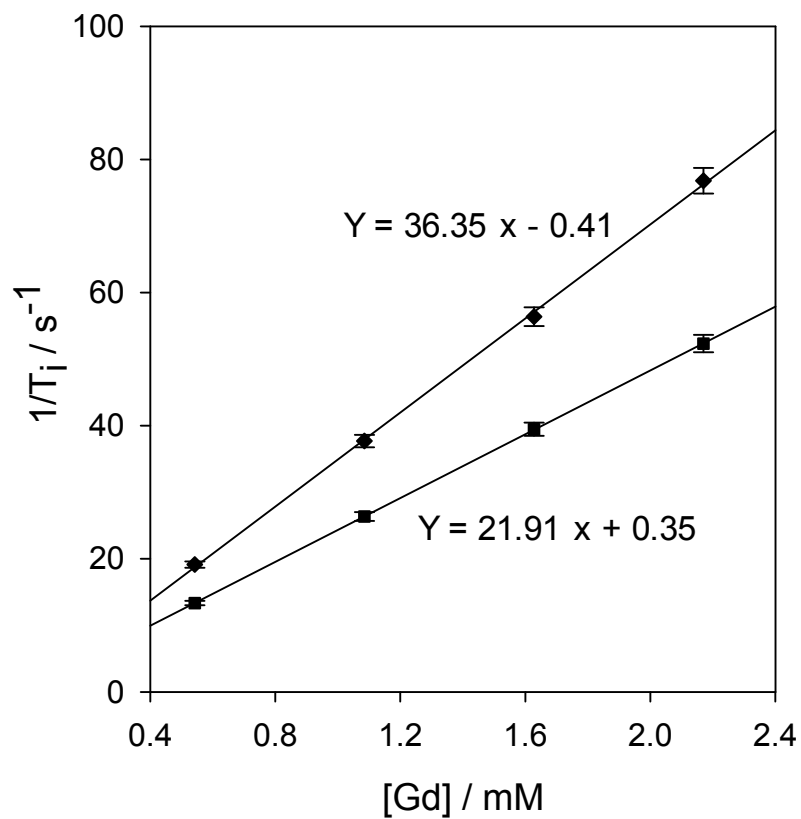

**Figure S5.** Longitudinal ( $1/T_1 + C$ , squares) and transverse ( $1/T_2 + C$ , diamonds) relaxation rates of Ri7-MSN (i.e. MSN-DTPA(Gd)-PEG-Ri7) nanoparticles, as a function of  $Gd^{3+}$  concentration values.

Supporting Information

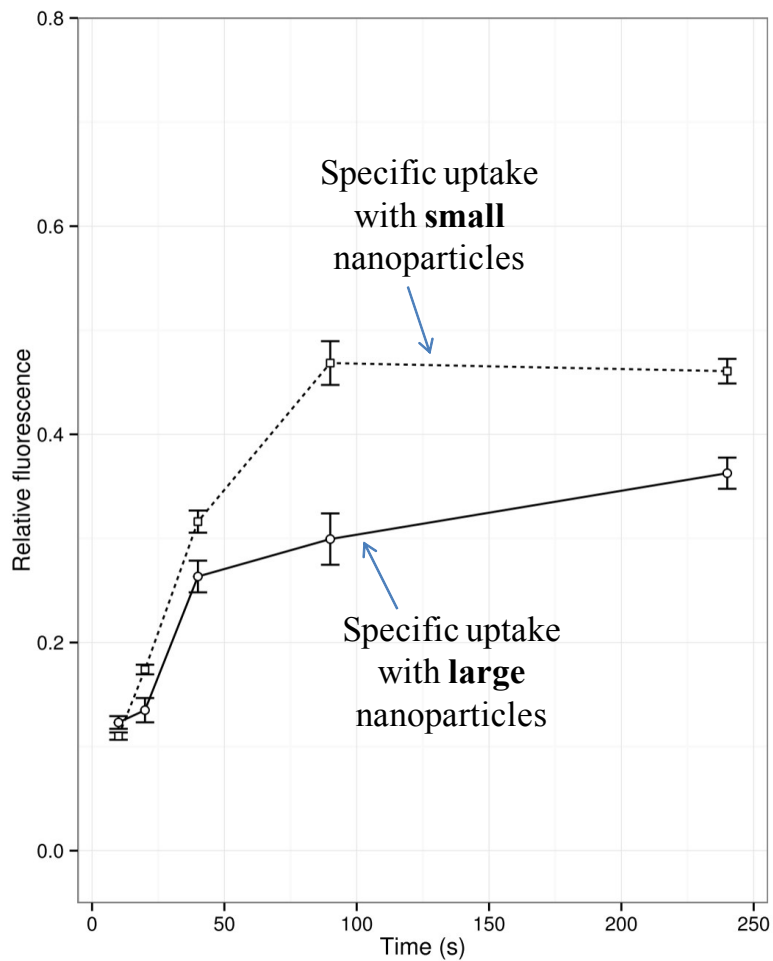

**Figure S6.** Specific uptake of mesoporous silica nanoparticles, obtained by subtracting the fluorescence values of Ri7<sup>fl</sup>-MSN uptake of that of IgG<sup>fl</sup>-MSN.

## Supporting Information

### TABLES.

**Table S1.** Hydrodynamic diameters and polydispersion indexes of the nanoparticles, before and after antibody bioconjugation.

| MSN <sub>x</sub>                 | Solution | Time   | Hydrodynamic diameter [nm] |                |           | Polydispersion index (PDI) |
|----------------------------------|----------|--------|----------------------------|----------------|-----------|----------------------------|
|                                  |          |        | Number mode                | Intensity mode | Z-average |                            |
| MSN <sub>50</sub>                | Water    | 24 h   | 57                         | 96             | 85        | 0.141                      |
|                                  |          | 1 week | 61                         | 101            | 98        | 0.131                      |
|                                  | PBS      | 24 h   | 62                         | 95             | 91        | 0.145                      |
|                                  |          | 1 week | 59                         | 103            | 97        | 0.155                      |
| MSN <sub>50</sub> -DTPA(Gd)-Ri7  | Water    | 24 h   | 82                         | 151            | 141       | 0.205                      |
|                                  |          | 1 week | 89                         | 160            | 150       | 0.154                      |
|                                  | PBS      | 24 h   | 75                         | 165            | 147       | 0.200                      |
|                                  |          | 1 week | 88                         | 155            | 151       | 0.166                      |
| MSN <sub>160</sub>               | Water    | 24 h   | 181                        | 206            | 195       | 0.045                      |
|                                  |          | 1 week | 181                        | 202            | 193       | 0.018                      |
|                                  | PBS      | 24 h   | 182                        | 210            | 199       | 0.058                      |
|                                  |          | 1 week | 195                        | 219            | 208       | 0.037                      |
| MSN <sub>160</sub> -DTPA(Gd)-Ri7 | Water    | 24 h   | 220                        | 255            | 245       | 0.115                      |
|                                  |          | 1 week | 224                        | 259            | 243       | 0.063                      |
|                                  | PBS      | 24 h   | 240                        | 290            | 265       | 0.195                      |
|                                  |          | 1 week | 227                        | 295            | 257       | 0.221                      |
